# Supplementary material for: New origin firing is inhibited by APC/CCdh1 activation in S-phase after severe replication stress
Source: PubMed Central journal article supplement — Nucleic Acids Res. 2016 Mar 2;44(10):4745–62. doi: 10.1093/nar/gkw132 (PMC4889930; doi:10.1093/nar/gkw132), 2016-03-02

# Supplementary Figure S1

**A**

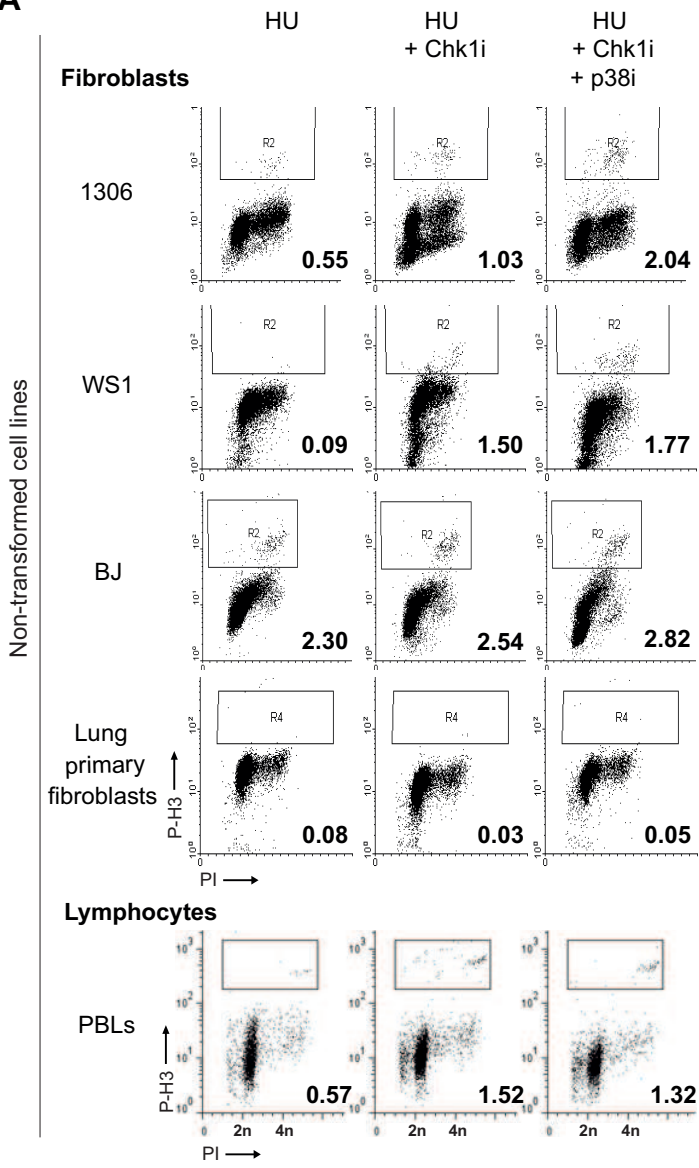

**B**

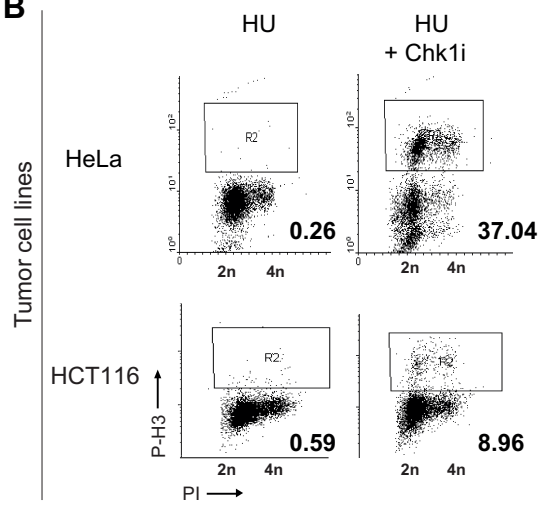

**C**

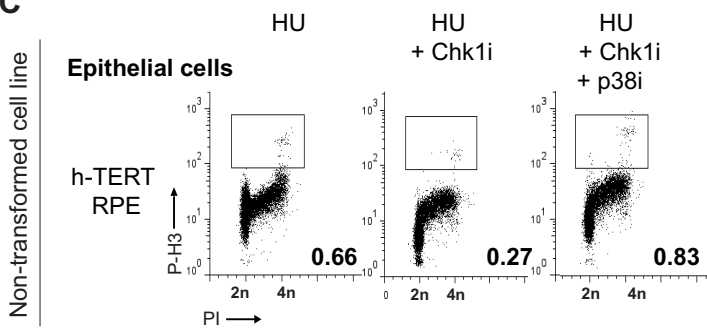

Supplementary Figure S2

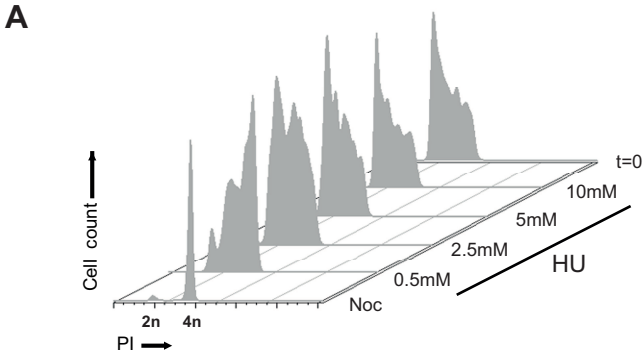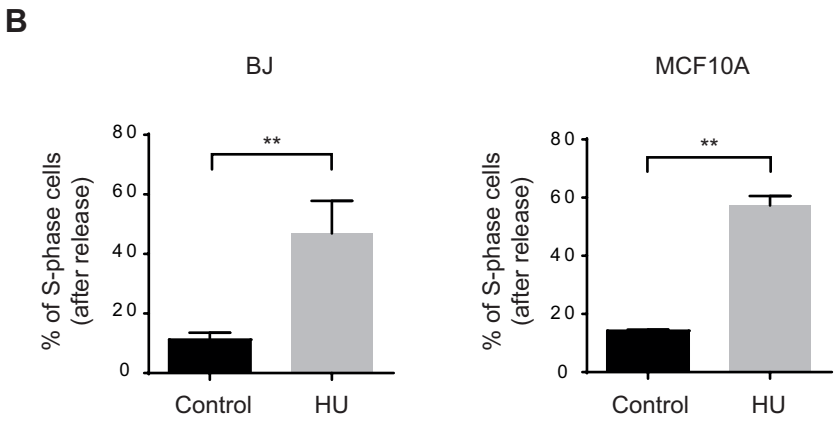

### Supplementary Figure S3

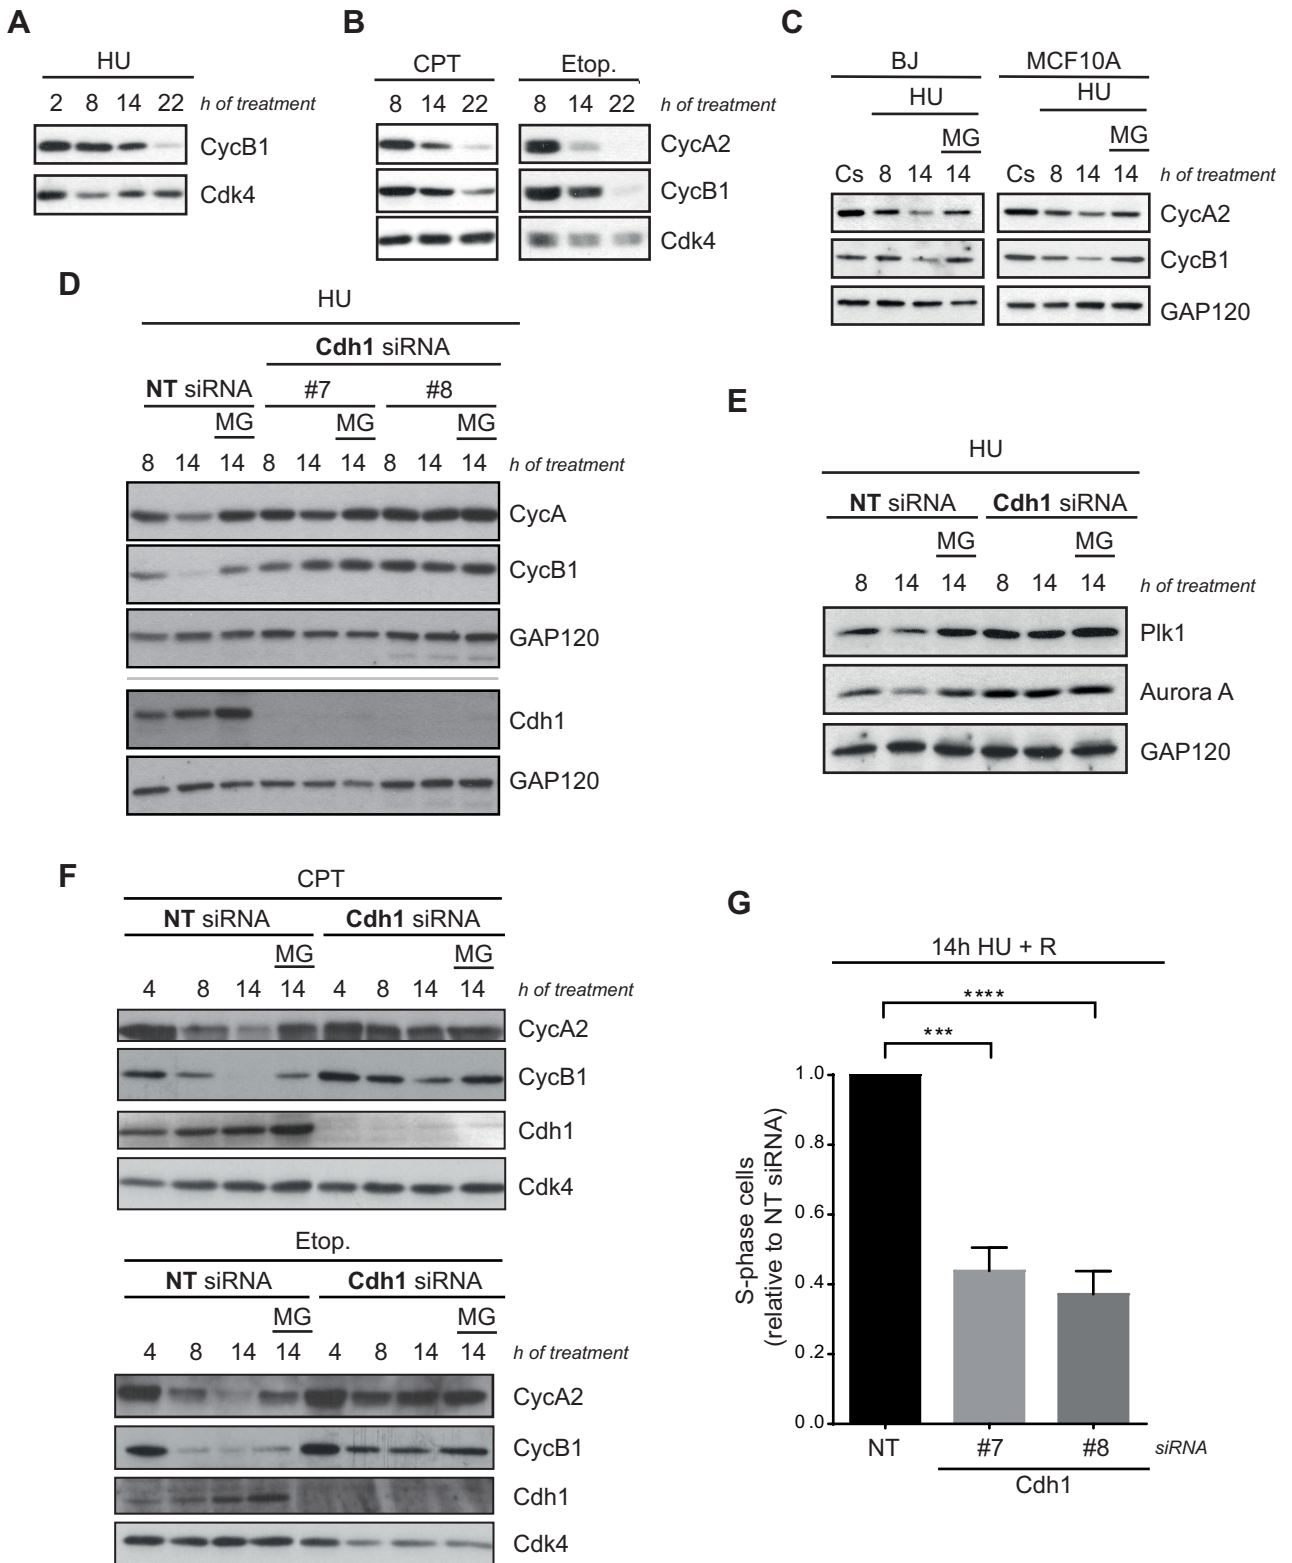

## Supplementary Figure S4

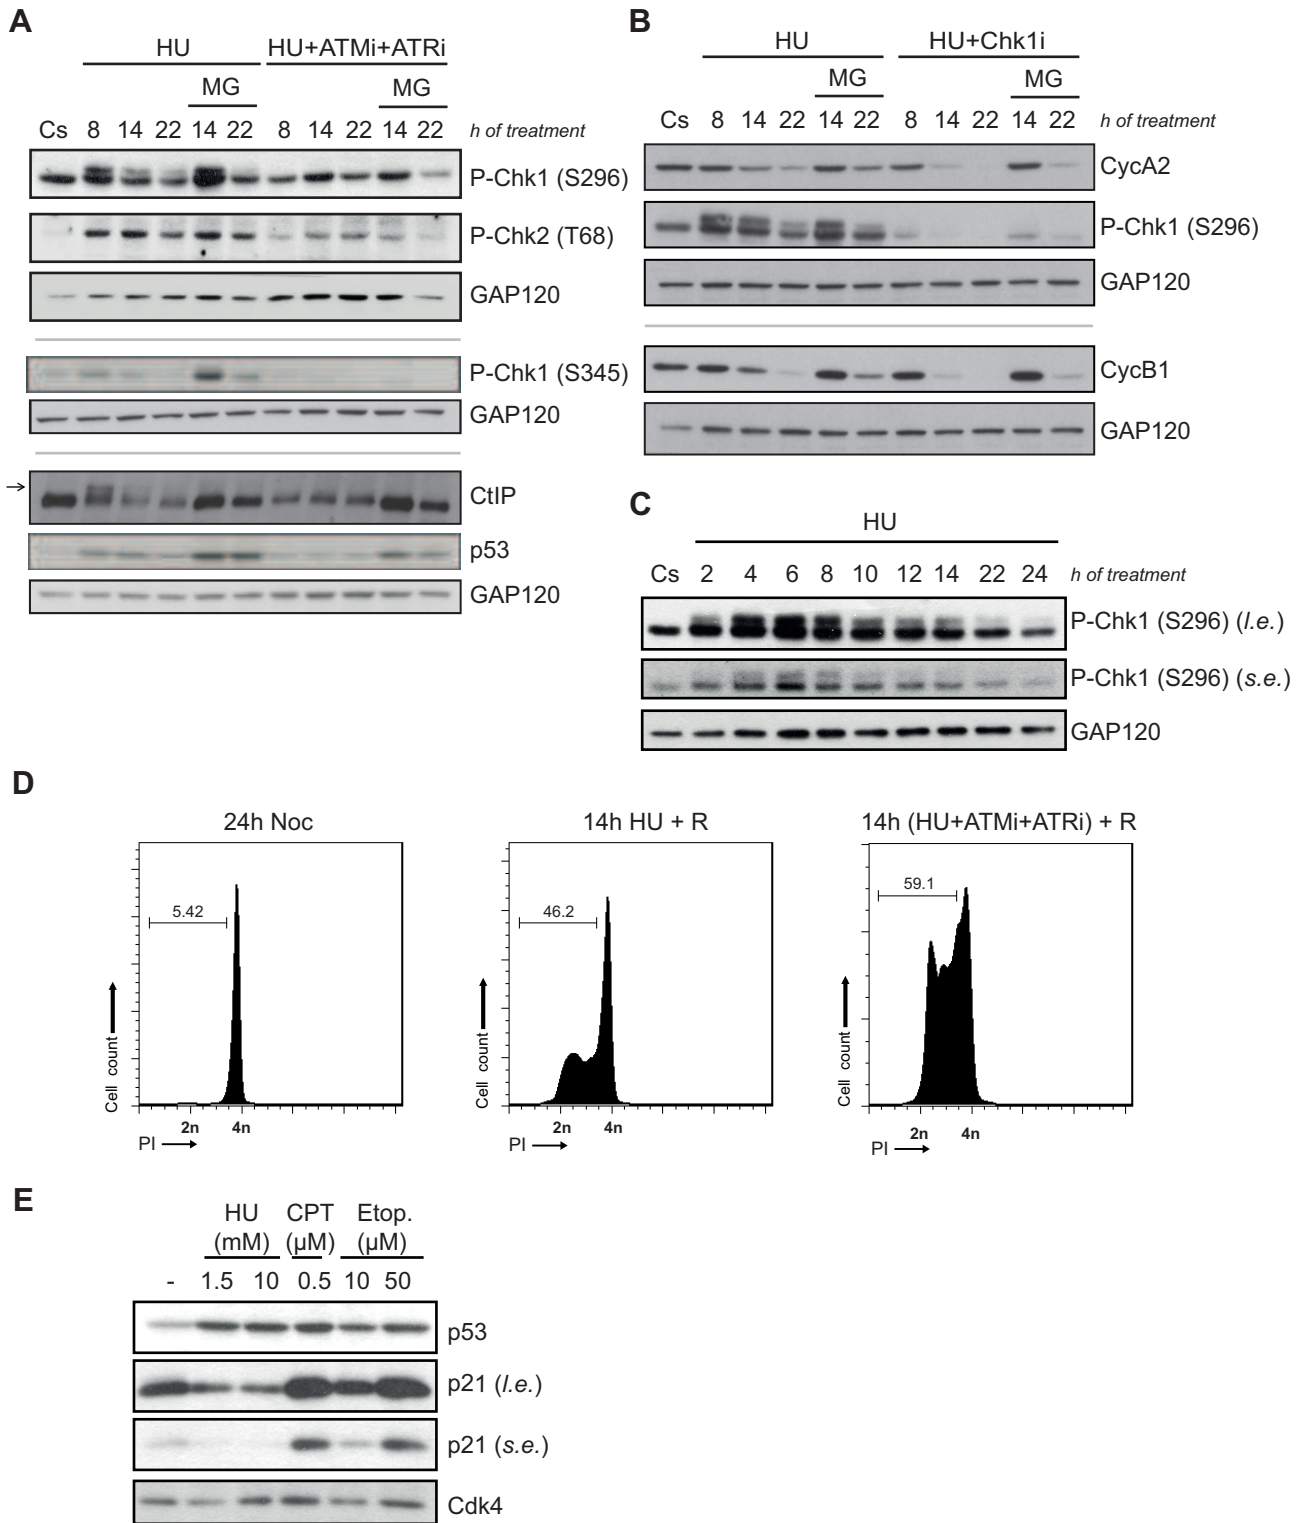

### Supplementary Figure S5

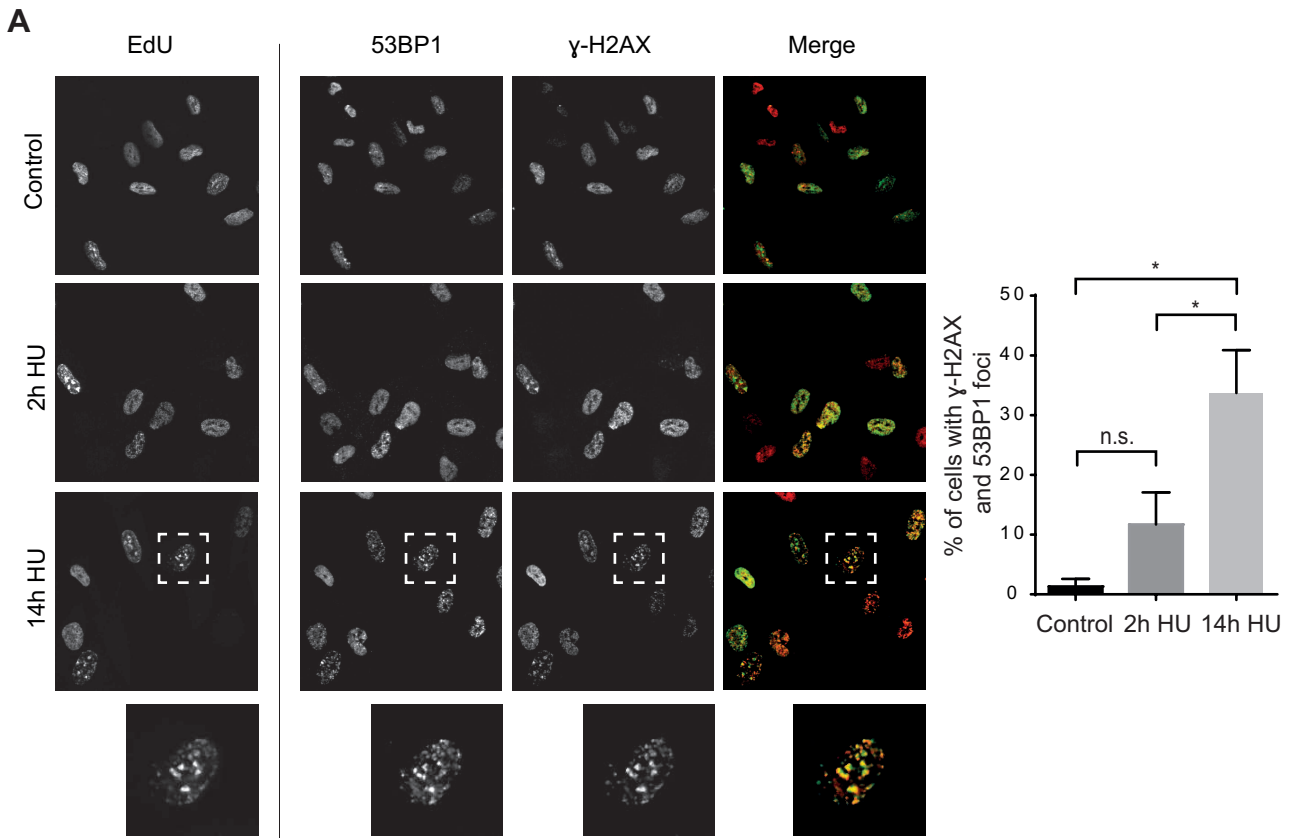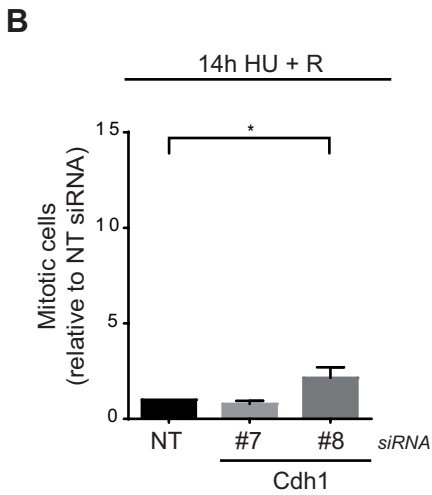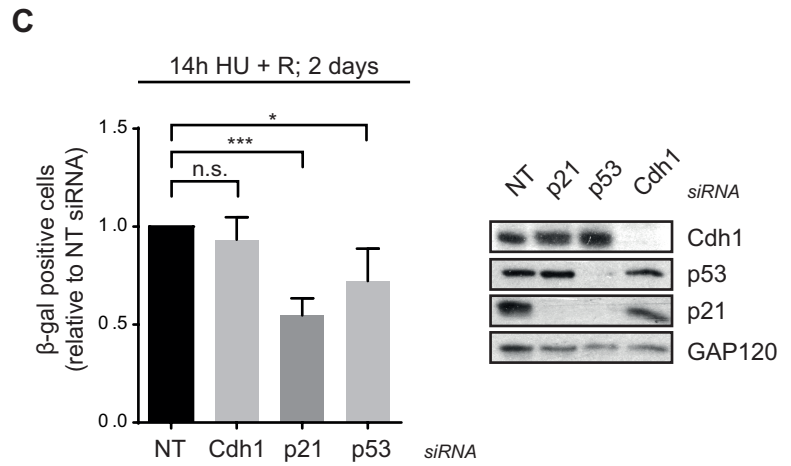

# Supplementary Figure S6

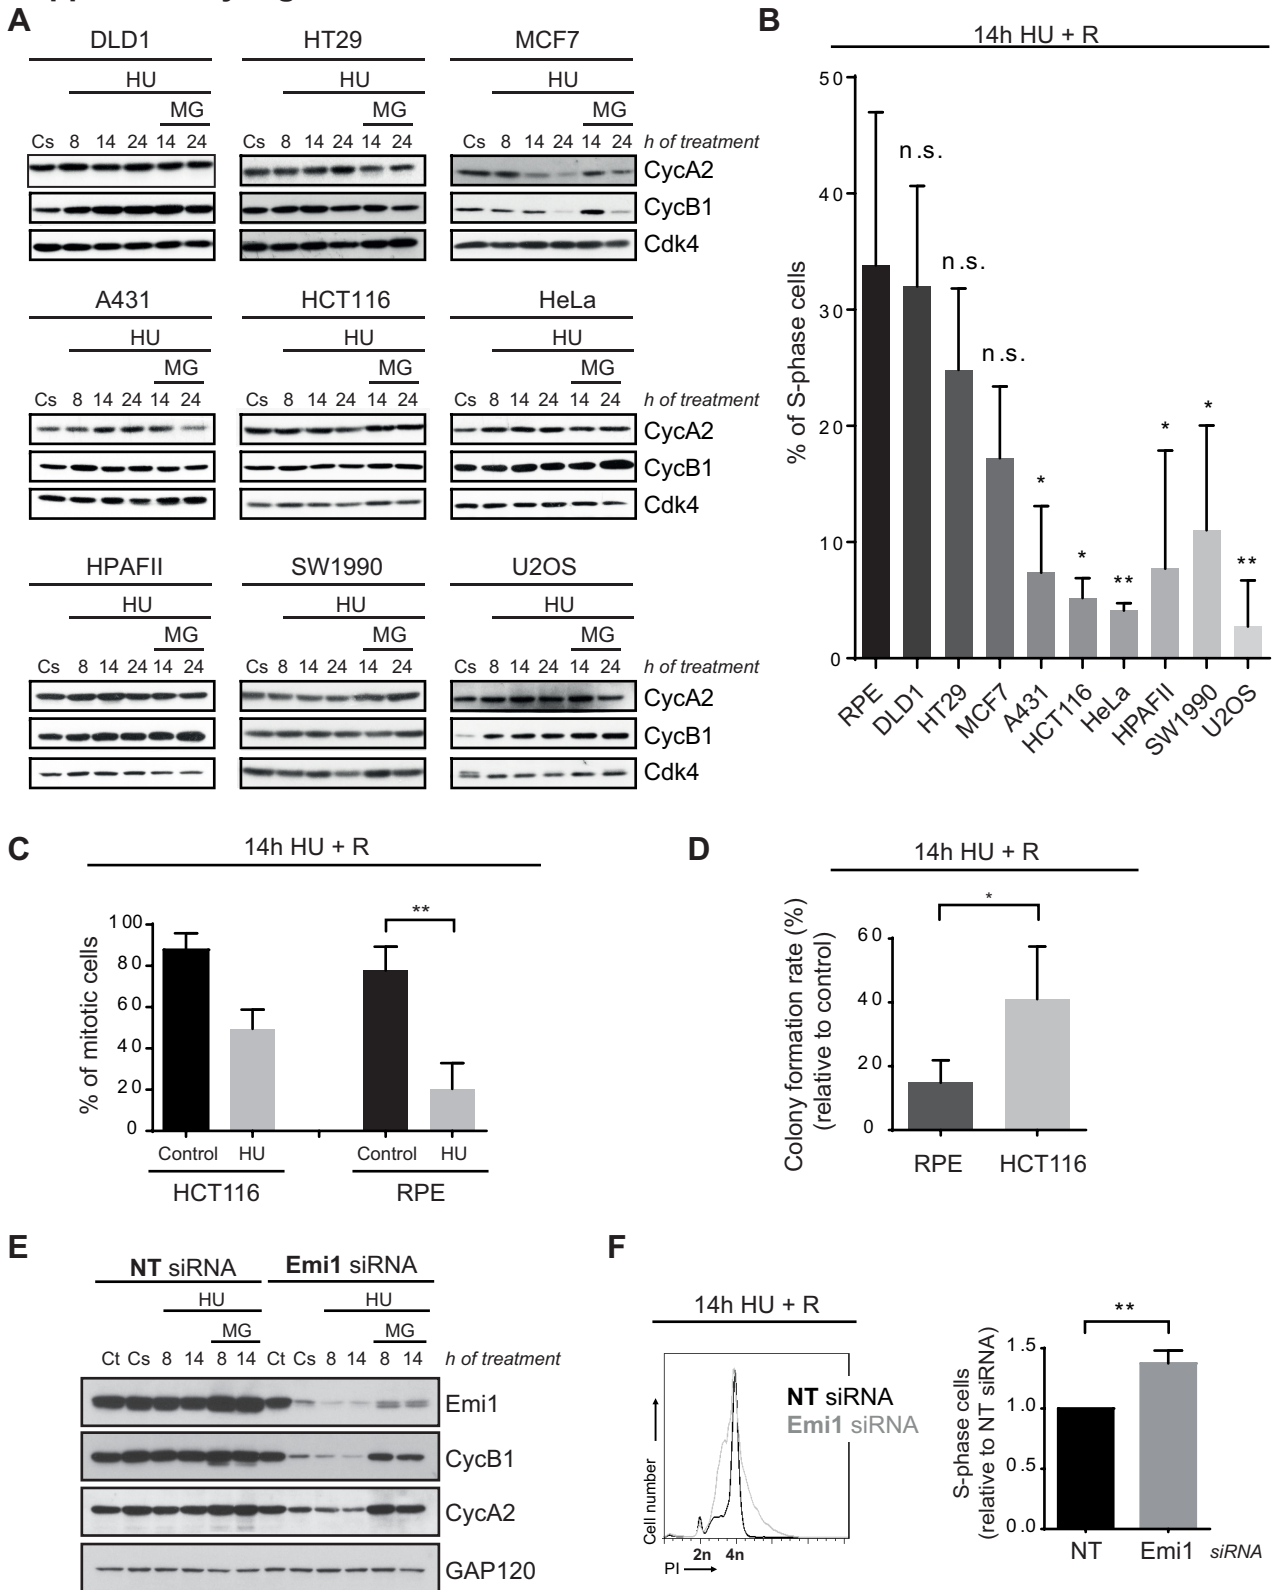

# Supplementary Figure S7

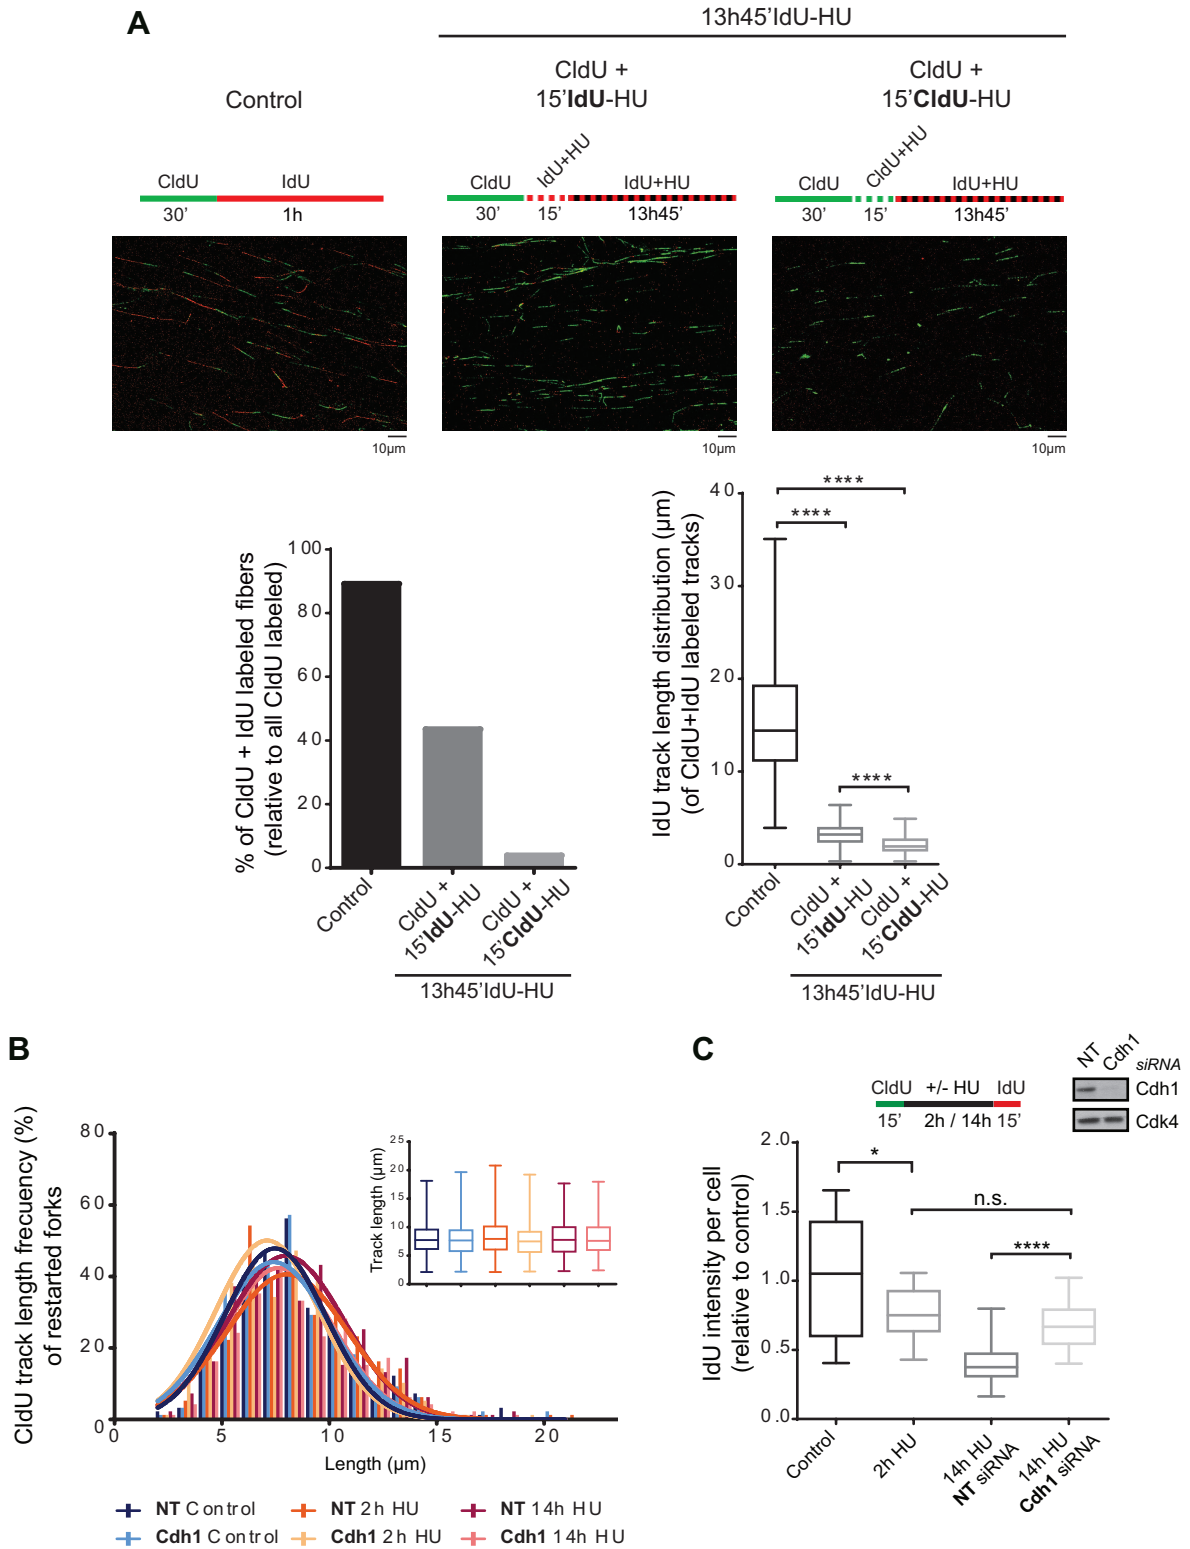

Supplement: supp_gkw132_nar-03103-d-2015-File010.pdf [file supp_gkw132_nar-03103-d-2015-File010.pdf]
